# Supplementary material for: Integration of proteomic, metabolomic, and ubiquitinomic analyses reveals potential mechanisms underlying low-phosphorus stress adaptation in soybean roots
Source: Research Square preprint supplement (doi:10.21203/rs.3.rs-8083659/v1), 2025-12-04
Supplement: Supplementary file 2 [file de89796b02fd5603beccd6e6.docx]

**Table S1 Protocol of proteomics, ubiquitinomics and parallel reaction monitoring analysis**

| **Methodological Step** | Proteomics | Ubiquitinomics |
| --- | --- | --- |
| **Liquid Chromatography (LC) Separation** | | |
| **Chromatography System** | NanoElute UPLC | |
| **Mobile Phase** | Phase A: 0.1% formic acid, 2% acetonitrile;  Phase B: 0.1% formic acid, 100% acetonitrile | |
| **Gradient setting** | 0-70 min, 6%-24% B  70-84 min, 24%-35% B  84-87 min, 35%-80% B  87-90 min, 80% B | 0-44 min, 6%-22% B  44-54 min, 22%-30% B  54-57 min, 30%-80% B  57-60 min, 80% B |
| **Flow Rate** | 450 nL/min | |
| **Mass Spectrometry (MS) Analysis** | | |
| **Mass Spectrometer Model** | timsTOF Pro | |
| **Ion Source** | Capillary | |
| **Ion Source Voltage** | 1.75 kV | 1.7 kV |
| **Mass Analyzer** | TIMS-TOF | |
| **MS2 Scan Range** | 400 - 1500 m/z | 100 - 1700 m/z |
| **Resolution** | High Resolution | |
| **Data Acquisition Mode** | | |
| **Acquisition Mode** | DDA | |
| **Key Parameters** | Top 10 scans; Precursor charge 0-5; Dynamic exclusion: 30s | |
| **Database Search** | | |
| **Analysis Software** | MaxQuant (v1.6.15.0) | |
| **Digestion Parameters** | Enzyme: Trypsin/P; Missed cleavages: 3 | |
| **Mass Error Tolerance** | MS1: 20 ppm; MS2: 0.02 Da | |
| **Variable Modifications** | Carbamidomethylation on cystine was set as fixed modification, while oxidation on methionine, and ubiquitination on lysine and protein N-terminal methionine were set as variable modifications. | |
| **Result Filtering** | FDR < 1% | |

**Table S2 Effects of low phosphorus stress on soybean root architecture**

| Indices | | Treatment time | | | | |
| --- | --- | --- | --- | --- | --- | --- |
| CK | H12 | D1 | D3 | D7 |
| Root length  (cm) | +Pi | 726±36 | 870±15 | 886±46 | 1722±75 | 1886±39 |
| -Pi | 819±18 | 860±11 | 934±21 | 2183±47* | 2205±82* |
| Root surface area  (cm2) | +Pi | 108±3 | 120±13 | 254±13 | 490±26 | 571±30 |
| -Pi | 105±1 | 120±13 | 304±19 | 556±30 | 620±34 |
| Average diameter of roots (mm) | +Pi | 0.36±0.02 | 0.43±0.01 | 0.59±0.02 | 0.81±0.03 | 1.00±0.07 |
| -Pi | 0.39±0.02 | 0.42±0.01 | 0.59±0.03 | 0.72±0.03 | 0.95±0.01 |
| Root volume  (cm3) | +Pi | 2.96±0.12 | 3.68±0.27 | 3.90±0.37 | 8.87±0.41 | 11.42±0.71 |
| -Pi | 2.89±0.31 | 3.53±0.23 | 4.73±0.23 | 11.31±0.10* | 14.71±0.33* |

Note: +Pi: normal phosphorus supply; -Pi: low phosphorus stress. Each value is the mean (±SE) of three replicates. * indicate the difference between different phosphorus treatments (*p*<0.05

**Table S3 Effects of low phosphorus stress on organic acids in soybean exudates**

| Indices | | Treatment time | | | | |
| --- | --- | --- | --- | --- | --- | --- |
| CK | H12 | D1 | D3 | D7 |
| Oxalic acid  (mg∙h-1∙g-1) | +Pi | 0.04±0.00 | 1.63±0.25 | 2.39±0.26 | 6.72±0.08 | 3.65±0.21 |
| -Pi | 0.04±0.00 | 2.71±0.33 | 2.55±0.24 | 9.18±0.41* | 4.45±0.03* |
| Acetic acid  (mg∙h-1∙g-1) | +Pi | 0.05±0.00 | 0.06±0.00 | 0.28±0.02 | 2.12±0.11 | 0.46±0.02 |
| -Pi | 0.05±0.00 | 0.06±0.01 | 0.52±0.00* | 2.91±0.18* | 0.77±0.03* |
| Lactic acid  (mg∙h-1∙g-1) | +Pi | 0.03±0.00 | 0.12±0.01 | 0.23±0.012 | 0.57±0.05 | 0.38±0.03 |
| -Pi | 0.03±0.00 | 0.39±0.02* | 0.44±0.02* | 0.79±0.04* | 0.65±0.03* |
| Citric acid  (mg∙h-1∙g-1) | +Pi | 0.04±0.01 | 0.05±0.00 | 0.18±0.02 | 0.49±0.04 | 0.35±0.01 |
| -Pi | 0.04±0.00 | 0.08±0.00* | 0.19±0.02 | 0.67±0.01* | 0.41±0.01* |
| Tartaric acid  (mg∙h-1∙g-1) | +Pi | 0.03±0.00 | 0.04±0.00 | 0.074±0.00 | 0.08±0.00 | 0.052±0.00 |
| -Pi | 0.03±0.00 | 0.04±0.00 | 0.09±0.01 | 0.20±0.01** | 0.10±0.00** |
| Malic acid  (mg∙h-1∙g-1) | +Pi | 0.01±0.00 | 0.02±0.00 | 0.02±0.02 | 0.06±0.01 | 0.05±0.00 |
| -Pi | 0.01±0.00 | 0.03±0.00* | 0.04±0.00* | 0.15±0.01** | 0.06±0.00* |

Note: +Pi: normal phosphorus supply; -Pi: low phosphorus stress. Each value is the mean (±SE) of three replicates. * indicate the difference between different phosphorus treatments (*p*<0.05).

**Table S4 Effects of low phosphorus stress on SOD and POD activity, and proline content in soybean roots**

| Indices | | Treatment time | | | | |
| --- | --- | --- | --- | --- | --- | --- |
| CK | H12 | D1 | D3 | D7 |
| SOD activity  (U∙g-1) | +Pi | 178±5.4 | 151±2.4 | 196±10 | 274±2.2 | 76±8.1 |
| -Pi | 184±9.3 | 391±7.8* | 254±8.4* | 363±2.2* | 173±6* |
| POD activity  (U∙g-1) | +Pi | 89±3.2 | 104±5.1 | 94±3.2 | 78±0.57 | 75±0.76 |
| -Pi | 87±0.93 | 109±6 | 100±8.3 | 88±0.84* | 94±5* |
| proline content  (μg∙g-1) | +Pi | 10±0.07 | 10±0.17 | 16±0.76 | 23±1.12 | 24±0.65 |
| -Pi | 11±0.07 | 14±0.20* | 19±0.45* | 28±1.16* | 38±0.85* |

Note: +Pi: normal phosphorus supply; -Pi: low phosphorus stress. Each value is the mean (±SE) of three replicates. * indicate the difference between different phosphorus treatments (*p*<0.05).

**Table S5 Effects of low phosphorus stress on chlorophyll fluorescence parameters of soybean**

| Indices | | Treatment time | | | | |
| --- | --- | --- | --- | --- | --- | --- |
| CK | H12 | D1 | D3 | D7 |
| ΦPSⅡ | +Pi | 0.45±0.01 | 0.46±0.01 | 0.44±0.01 | 0.44±0.03 | 0.57±0.02 |
| -Pi | 0.44±0.01 | 0.39±0.00* | 0.38±0.01* | 0.43±0.00* | 0.51±0.01* |
| ETR | +Pi | 36.6±0.26 | 36.7±1.34 | 35.8±0.49 | 35.6±0.23 | 38.3±0.79 |
| -Pi | 36.0±0.3 | 33.0±1.30 | 32.8±0.66* | 34.6±0.12* | 35.2±0.57* |
| qP | +Pi | 0.56±0.01 | 0.59±0.05 | 0.63±0.01 | 0.67±0.04 | 0.64±0.01 |
| -Pi | 0.54±0.01 | 0.53±0.01* | 0.58±0.02 | 0.57±0.01* | 0.59±0.01* |
| NPQ | +Pi | 0.55±0.01 | 0.55±0.01 | 0.50±0.01 | 0.60±0.02 | 0.45±0.01 |
| -Pi | 0.55±0.01 | 0.57±0.02 | 0.63±0.04* | 0.74±0.02* | 0.87±0.02* |
| Fv/Fo | +Pi | 6.12±0.39 | 4.61±0.27 | 4.90±0.01 | 4.81±0.10 | 5.61±0.19 |
| -Pi | 5.77±0.34 | 3.87±0.06 | 3.35±0.05* | 2.57±0.06* | 2.61±0.03* |
| Fv/Fm | +Pi | 0.86±0.01 | 0.82±0.01 | 0.83±0.01 | 0.83±0.02 | 0.84±0.02 |
| -Pi | 0.85±0.013 | 0.79±0.01* | 0.77±0.01* | 0.72±0.01* | 0.72±0.01* |

Note: +Pi: normal phosphorus supply; -Pi: low phosphorus stress. Each value is the mean (±SE) of three replicates. * indicate the difference between different phosphorus treatments (*p*<0.05).

**Table S6 GO enrichment of differentially expressed proteins in soybean root**

|  | Category | GOID | Description | GeneRatio | -log10(p value) | Mapping | Up | Down |
| --- | --- | --- | --- | --- | --- | --- | --- | --- |
| H12 | Cellular Component | GO:0005856 | cytoskeleton | 12/5335 | 3.12 | 12 | 0 | 12 |
| GO:0010330 | cellulose synthase complex | 3/5335 | 2.91 | 3 | 0 | 3 |
| GO:0043527 | tRNA methyltransferase complex | 2/5335 | 2.43 | 2 | 0 | 2 |
| GO:0036449 | microtubule minus-end | 2/5335 | 2.43 | 2 | 0 | 2 |
| GO:0030981 | cortical microtubule cytoskeleton | 3/5335 | 2.32 | 3 | 0 | 3 |
| GO:0045298 | tubulin complex | 2/5335 | 2.21 | 2 | 0 | 2 |
| GO:0032580 | Golgi cisterna membrane | 2/5335 | 2.04 | 2 | 0 | 0 |
| GO:0015630 | microtubule cytoskeleton | 7/5335 | 1.99 | 7 | 0 | 7 |
| Molecular Function | GO:0015112 | nitrate transmembrane transporter activity | 5/4274 | 5.36 | 5 | 5 | 0 |
| GO:0050421 | nitrite reductase (NO-forming) activity | 2/4274 | 3.17 | 2 | 2 | 0 |
| GO:0005200 | structural constituent of cytoskeleton | 4/4274 | 2.82 | 4 | 0 | 4 |
| GO:0098809 | nitrite reductase activity | 2/4274 | 2.71 | 2 | 2 | 0 |
| GO:0045181 | glutamate synthase activity, NAD(P)H as acceptor | 2/4274 | 2.41 | 2 | 2 | 0 |
| GO:0016040 | glutamate synthase (NADH) activity | 2/4274 | 2.41 | 2 | 2 | 0 |
| GO:0002020 | protease binding | 3/4274 | 2.39 | 3 | 1 | 2 |
| GO:0008509 | anion transmembrane transporter activity | 7/4274 | 2.36 | 7 | 7 | 0 |
| Biological Process | GO:0015698 | inorganic anion transport | 6/4903 | 3.26 | 6 | 6 | 0 |
| GO:0042981 | regulation of apoptotic process | 5/4903 | 2.59 | 5 | 1 | 4 |
| GO:0009646 | response to absence of light | 4/4903 | 2.56 | 4 | 4 | 0 |
| GO:0009414 | response to water deprivation | 11/4903 | 2.46 | 11 | 4 | 7 |
| GO:0072697 | protein localization to cell cortex | 2/4903 | 2.4 | 2 | 0 | 2 |
| GO:2000067 | regulation of root morphogenesis | 2/4903 | 2.4 | 2 | 0 | 2 |
| GO:0030001 | metal ion transport | 6/4903 | 2.27 | 6 | 5 | 1 |
| GO:0098656 | anion transmembrane transport | 7/4903 | 2.23 | 7 | 7 | 0 |
| GO:0042136 | neurotransmitter biosynthetic process | 2/4903 | 2.19 | 2 | 2 | 0 |
| GO:0071249 | cellular response to nitrate | 2/4903 | 2.19 | 2 | 2 | 0 |
| GO:0044380 | protein localization to cytoskeleton | 2/4903 | 2.19 | 2 | 0 | 2 |
| GO:0034220 | ion transmembrane transport | 13/4903 | 2.14 | 13 | 13 | 0 |
| GO:1905421 | regulation of plant organ morphogenesis | 2/4903 | 2.02 | 2 | 0 | 2 |
| GO:0070726 | cell wall assembly | 2/4903 | 2.02 | 2 | 0 | 2 |
| D1 | Cellular Component | GO:0036449 | microtubule minus-end | 4/5335 | 5.61 | 4 | 0 | 4 |
| GO:1990752 | microtubule end | 4/5335 | 4.1 | 4 | 0 | 4 |
| GO:0009346 | citrate lyase complex | 4/5335 | 4.1 | 4 | 1 | 3 |
| GO:0010330 | cellulose synthase complex | 4/5335 | 3.58 | 4 | 0 | 4 |
| GO:0055028 | cortical microtubule | 4/5335 | 3.37 | 4 | 0 | 4 |
| GO:0030981 | cortical microtubule cytoskeleton | 4/5335 | 2.74 | 4 | 0 | 4 |
| GO:0005881 | cytoplasmic microtubule | 4/5335 | 2.62 | 4 | 0 | 4 |
| GO:0009898 | cytoplasmic side of plasma membrane | 4/5335 | 2.62 | 4 | 0 | 0 |
| Molecular Function | GO:0003878 | ATP citrate synthase activity | 4/4274 | 3.99 | 4 | 1 | 3 |
| GO:0046527 | glucosyltransferase activity | 12/4274 | 3.46 | 12 | 7 | 5 |
| GO:0035251 | UDP-glucosyltransferase activity | 10/4274 | 3.11 | 10 | 7 | 3 |
| GO:0015112 | nitrate transmembrane transporter activity | 4/4274 | 3.07 | 4 | 4 | 0 |
| GO:0080044 | quercetin 7-O-glucosyltransferase activity | 8/4274 | 3.01 | 8 | 0 | 0 |
| GO:0080043 | quercetin 3-O-glucosyltransferase activity | 8/4274 | 3.01 | 8 | 0 | 0 |
| GO:0008194 | UDP-glycosyltransferase activity | 11/4274 | 2.77 | 11 | 0 | 0 |
| GO:0008114 | phosphogluconate 2-dehydrogenase activity | 2/4274 | 2.74 | 2 | 2 | 0 |
| Biological Process | GO:0072697 | protein localization to cell cortex | 4/4903 | 5.69 | 4 | 0 | 4 |
| GO:2000067 | regulation of root morphogenesis | 4/4903 | 5.69 | 4 | 0 | 4 |
| GO:0044380 | protein localization to cytoskeleton | 4/4903 | 5 | 4 | 0 | 4 |
| GO:0006073 | cellular glucan metabolic process | 13/4903 | 4.64 | 13 | 3 | 10 |
| GO:1905421 | regulation of plant organ morphogenesis | 4/4903 | 4.54 | 4 | 0 | 4 |
| GO:0070726 | cell wall assembly | 4/4903 | 4.54 | 4 | 0 | 4 |
| GO:0044042 | glucan metabolic process | 13/4903 | 4.53 | 13 | 3 | 10 |
| GO:1990778 | protein localization to cell periphery | 6/4903 | 4.44 | 6 | 1 | 5 |
| GO:0033692 | cellular polysaccharide biosynthetic process | 11/4903 | 4.08 | 11 | 1 | 10 |
| GO:0000271 | polysaccharide biosynthetic process | 11/4903 | 4.02 | 11 | 1 | 10 |
| GO:0044264 | cellular polysaccharide metabolic process | 14/4903 | 3.91 | 14 | 4 | 10 |
| GO:0034637 | cellular carbohydrate biosynthetic process | 11/4903 | 3.34 | 11 | 1 | 10 |
| D3 | Cellular Component | GO:0005881 | cytoplasmic microtubule | 7/5335 | 5.36 | 7 | 0 | 7 |
| GO:0036449 | microtubule minus-end | 4/5335 | 5.14 | 4 | 0 | 4 |
| GO:0010330 | cellulose synthase complex | 5/5335 | 4.41 | 5 | 0 | 5 |
| GO:0055028 | cortical microtubule | 5/5335 | 4.12 | 5 | 0 | 5 |
| GO:0010319 | stromule | 7/5335 | 3.81 | 7 | 6 | 0 |
| GO:1990752 | microtubule end | 4/5335 | 3.65 | 4 | 0 | 4 |
| GO:0030981 | cortical microtubule cytoskeleton | 5/5335 | 3.3 | 5 | 0 | 5 |
| GO:0030863 | cortical cytoskeleton | 6/5335 | 3.04 | 6 | 0 | 6 |
| Molecular Function | GO:0033612 | receptor serine/threonine kinase binding | 5/4274 | 2.8 | 5 | 0 | 5 |
| GO:0008114 | phosphogluconate 2-dehydrogenase activity | 2/4274 | 2.48 | 2 | 2 | 0 |
| GO:0050421 | nitrite reductase (NO-forming) activity | 2/4274 | 2.48 | 2 | 2 | 0 |
| GO:0043325 | phosphatidylinositol-3,4-bisphosphate binding | 2/4274 | 2.48 | 2 | 0 | 2 |
| GO:0045548 | phenylalanine ammonia-lyase activity | 3/4274 | 2.48 | 3 | 0 | 3 |
| GO:0008810 | cellulase activity | 3/4274 | 2.25 | 3 | 0 | 3 |
| GO:0009044 | xylan 1,4-beta-xylosidase activity | 3/4274 | 2.07 | 3 | 0 | 3 |
| GO:0097599 | xylanase activity | 3/4274 | 2.07 | 3 | 0 | 3 |
| Biological Process | GO:0030865 | cortical cytoskeleton organization | 10/4903 | 5.33 | 10 | 0 | 10 |
| GO:0072697 | protein localization to cell cortex | 4/4903 | 5.11 | 4 | 0 | 4 |
| GO:2000067 | regulation of root morphogenesis | 4/4903 | 5.11 | 4 | 0 | 4 |
| GO:0051592 | response to calcium ion | 6/4903 | 4.58 | 6 | 0 | 6 |
| GO:0044380 | protein localization to cytoskeleton | 4/4903 | 4.43 | 4 | 0 | 4 |
| GO:1905421 | regulation of plant organ morphogenesis | 4/4903 | 3.97 | 4 | 0 | 4 |
| GO:0070726 | cell wall assembly | 4/4903 | 3.97 | 4 | 0 | 4 |
| GO:0050777 | negative regulation of immune response | 6/4903 | 3.97 | 6 | 0 | 6 |
| GO:0009414 | response to water deprivation | 21/4903 | 3.93 | 21 | 9 | 12 |
| GO:0010555 | response to mannitol | 4/4903 | 3.62 | 4 | 2 | 2 |
| GO:0085029 | extracellular matrix assembly | 5/4903 | 3.44 | 5 | 1 | 4 |
| D7 | Cellular Component | GO:0000325 | plant-type vacuole | 13/5335 | 2.91 | 13 | 7 | 6 |
| GO:0005576 | extracellular region | 25/5335 | 2.74 | 25 | 0 | 10 |
| GO:0000322 | storage vacuole | 5/5335 | 2.68 | 5 | 0 | 0 |
| GO:0009705 | plant-type vacuole membrane | 8/5335 | 2.22 | 8 | 7 | 0 |
| GO:0000326 | protein storage vacuole | 4/5335 | 2.2 | 4 | 0 | 2 |
| GO:0005887 | integral component of plasma membrane | 9/5335 | 2.04 | 9 | 7 | 0 |
| GO:0000795 | synaptonemal complex | 2/5335 | 1.93 | 2 | 2 | 0 |
| GO:0032586 | protein storage vacuole membrane | 2/5335 | 1.93 | 2 | 2 | 0 |
| Molecular Function | GO:0004611 | phosphoenolpyruvate carboxykinase activity | 6/4274 | 5.17 | 6 | 5 | 1 |
| GO:0008964 | phosphoenolpyruvate carboxylase activity | 5/4274 | 5.16 | 5 | 5 | 0 |
| GO:0016866 | intramolecular transferase activity | 7/4274 | 4.4 | 7 | 5 | 2 |
| GO:0045548 | phenylalanine ammonia-lyase activity | 4/4274 | 4.01 | 4 | 4 | 0 |
| GO:1901683 | arsenate ion transmembrane transporter activity | 4/4274 | 3.66 | 4 | 4 | 0 |
| GO:0004497 | monooxygenase activity | 9/4274 | 3.25 | 9 | 6 | 3 |
| GO:0016841 | ammonia-lyase activity | 4/4274 | 3.14 | 4 | 4 | 0 |
| GO:0003993 | acid phosphatase activity | 6/4274 | 2.95 | 6 | 5 | 1 |
| Biological Process | GO:0031669 | cellular response to nutrient levels | 18/4903 | 5.97 | 18 | 14 | 4 |
| GO:0009267 | cellular response to starvation | 16/4903 | 5.35 | 16 | 14 | 2 |
| GO:0042594 | response to starvation | 16/4903 | 4.85 | 16 | 14 | 2 |
| GO:0015698 | inorganic anion transport | 9/4903 | 4.01 | 9 | 9 | 0 |
| GO:0009739 | response to gibberellin | 8/4903 | 3.41 | 8 | 8 | 0 |
| GO:0046898 | response to cycloheximide | 4/4903 | 3.24 | 4 | 4 | 0 |
| GO:0006073 | cellular glucan metabolic process | 12/4903 | 2.99 | 12 | 10 | 2 |
| GO:0046271 | phenylpropanoid catabolic process | 3/4903 | 2.97 | 3 | 3 | 0 |
| GO:0046274 | lignin catabolic process | 3/4903 | 2.97 | 3 | 3 | 0 |
| GO:0044042 | glucan metabolic process | 12/4903 | 2.9 | 12 | 10 | 2 |
| GO:0044264 | cellular polysaccharide metabolic process | 14/4903 | 2.82 | 14 | 12 | 2 |
| GO:0051345 | positive regulation of hydrolase activity | 7/4903 | 2.62 | 7 | 0 | 0 |
| GO:0008299 | isoprenoid biosynthetic process | 9/4903 | 2.5 | 9 | 9 | 0 |
| GO:0042447 | hormone catabolic process | 3/4903 | 2.46 | 3 | 0 | 0 |

**Table S7 Funtion enrichment analysis of proteins cluster by Mfuzz**

| Cluster | Terms | Mapping | All mapping | Background | All background | Fold enrich | P value | Type |
| --- | --- | --- | --- | --- | --- | --- | --- | --- |
| Cluster1 | Cutin, suberine and wax biosynthesis | 2 | 23 | 3 | 191 | 5.54 | 0.0387 | KEGG |
| Cluster1 | Fatty acid degradation | 3 | 23 | 6 | 191 | 4.15 | 0.0242 | KEGG |
| Cluster1 | Flavonoid biosynthesis | 2 | 23 | 2 | 191 | 8.3 | 0.0139 | KEGG |
| Cluster1 | Galactose metabolism | 2 | 23 | 2 | 191 | 8.3 | 0.0139 | KEGG |
| Cluster1 | Pentose and glucuronate interconversions | 3 | 23 | 3 | 191 | 8.3 | 0.00155 | KEGG |
| Cluster1 | Plant-pathogen interaction | 3 | 23 | 6 | 191 | 4.15 | 0.0242 | KEGG |
| Cluster1 | lytic vacuole | 3 | 44 | 5 | 273 | 3.72 | 0.031 | GO_CC |
| Cluster1 | plant-type vacuole | 6 | 44 | 13 | 273 | 2.86 | 0.00895 | GO_CC |
| Cluster1 | pollen tube | 2 | 44 | 2 | 273 | 6.2 | 0.0255 | GO_CC |
| Cluster1 | protein storage vacuole | 3 | 44 | 5 | 273 | 3.72 | 0.031 | GO_CC |
| Cluster1 | storage vacuole | 3 | 44 | 5 | 273 | 3.72 | 0.031 | GO_CC |
| Cluster1 | vacuole | 15 | 44 | 41 | 273 | 2.27 | 0.000395 | GO_CC |
| Cluster1 | Glycosyl hydrolases family 32 C terminal | 2 | 38 | 2 | 261 | 6.87 | 0.0207 | Domain |
| Cluster1 | Glycosyl hydrolases family 32 N-terminal domain | 2 | 38 | 2 | 261 | 6.87 | 0.0207 | Domain |
| Cluster1 | Malectin-like domain | 2 | 38 | 2 | 261 | 6.87 | 0.0207 | Domain |
| Cluster1 | Protein kinase domain | 6 | 38 | 10 | 261 | 4.12 | 0.000887 | Domain |
| Cluster1 | Protein tyrosine and serine/threonine kinase | 4 | 38 | 6 | 261 | 4.58 | 0.00469 | Domain |
| Cluster1 | S-locus glycoprotein domain | 2 | 38 | 2 | 261 | 6.87 | 0.0207 | Domain |
| Cluster2 | Alanine, aspartate and glutamate metabolism | 5 | 38 | 8 | 191 | 3.14 | 0.00866 | KEGG |
| Cluster2 | Nitrogen metabolism | 6 | 38 | 8 | 191 | 3.77 | 9.00E-04 | KEGG |
| Cluster2 | Pentose phosphate pathway | 5 | 38 | 6 | 191 | 4.19 | 0.00128 | KEGG |
| Cluster2 | Photosynthesis | 4 | 38 | 4 | 191 | 5.03 | 0.00137 | KEGG |
| Cluster2 | Purine metabolism | 2 | 38 | 2 | 191 | 5.03 | 0.0387 | KEGG |
| Cluster2 | Sulfur metabolism | 2 | 38 | 2 | 191 | 5.03 | 0.0387 | KEGG |
| Cluster2 | RNA binding | 8 | 33 | 18 | 242 | 3.26 | 0.000853 | GO_MF |
| Cluster2 | anion transmembrane transporter activity | 5 | 33 | 13 | 242 | 2.82 | 0.0201 | GO_MF |
| Cluster2 | carboxylic acid transmembrane transporter activity | 2 | 33 | 2 | 242 | 7.33 | 0.0181 | GO_MF |
| Cluster2 | glucose-6-phosphate dehydrogenase activity | 2 | 33 | 2 | 242 | 7.33 | 0.0181 | GO_MF |
| Cluster2 | glutamate synthase (NADH) activity | 2 | 33 | 2 | 242 | 7.33 | 0.0181 | GO_MF |
| Cluster2 | glutamate synthase activity | 2 | 33 | 2 | 242 | 7.33 | 0.0181 | GO_MF |
| Cluster2 | glutamate synthase activity, NAD(P)H as acceptor | 2 | 33 | 2 | 242 | 7.33 | 0.0181 | GO_MF |
| Cluster2 | heterocyclic compound binding | 9 | 33 | 38 | 242 | 1.74 | 0.0496 | GO_MF |
| Cluster2 | inorganic anion transmembrane transporter activity | 4 | 33 | 11 | 242 | 2.67 | 0.0474 | GO_MF |
| Cluster2 | mRNA binding | 5 | 33 | 10 | 242 | 3.67 | 0.00537 | GO_MF |
| Cluster2 | nitrite reductase (NO-forming) activity | 2 | 33 | 2 | 242 | 7.33 | 0.0181 | GO_MF |
| Cluster2 | nitrite reductase activity | 2 | 33 | 2 | 242 | 7.33 | 0.0181 | GO_MF |
| Cluster2 | nucleic acid binding | 8 | 33 | 28 | 242 | 2.1 | 0.0216 | GO_MF |
| Cluster2 | organic acid transmembrane transporter activity | 2 | 33 | 2 | 242 | 7.33 | 0.0181 | GO_MF |
| Cluster2 | organic anion transmembrane transporter activity | 2 | 33 | 2 | 242 | 7.33 | 0.0181 | GO_MF |
| Cluster2 | organic cyclic compound binding | 9 | 33 | 38 | 242 | 1.74 | 0.0496 | GO_MF |
| Cluster2 | oxidoreductase activity | 12 | 33 | 43 | 242 | 2.05 | 0.00477 | GO_MF |
| Cluster2 | protein dimerization activity | 2 | 33 | 3 | 242 | 4.89 | 0.0496 | GO_MF |
| Cluster2 | protein homodimerization activity | 2 | 33 | 3 | 242 | 4.89 | 0.0496 | GO_MF |
| Cluster2 | chloroplast | 18 | 42 | 59 | 273 | 1.98 | 0.000591 | GO_CC |
| Cluster2 | chloroplast stroma | 10 | 42 | 24 | 273 | 2.71 | 0.00102 | GO_CC |
| Cluster2 | intracellular anatomical structure | 40 | 42 | 227 | 273 | 1.15 | 0.0131 | GO_CC |
| Cluster2 | intracellular membrane-bounded organelle | 34 | 42 | 182 | 273 | 1.21 | 0.0222 | GO_CC |
| Cluster2 | intracellular organelle | 34 | 42 | 188 | 273 | 1.18 | 0.0451 | GO_CC |
| Cluster2 | membrane-bounded organelle | 34 | 42 | 185 | 273 | 1.19 | 0.0319 | GO_CC |
| Cluster2 | mitochondrion | 7 | 42 | 21 | 273 | 2.17 | 0.027 | GO_CC |
| Cluster2 | nucleolus | 8 | 42 | 19 | 273 | 2.74 | 0.00337 | GO_CC |
| Cluster2 | plastid | 18 | 42 | 62 | 273 | 1.89 | 0.00122 | GO_CC |
| Cluster2 | plastid stroma | 10 | 42 | 24 | 273 | 2.71 | 0.00102 | GO_CC |
| Cluster2 | 2Fe-2S iron-sulfur cluster binding domain | 2 | 44 | 2 | 261 | 5.93 | 0.0279 | Domain |
| Cluster2 | Asparagine synthase | 3 | 44 | 3 | 261 | 5.93 | 0.00452 | Domain |
| Cluster2 | Conserved region in glutamate synthase | 2 | 44 | 2 | 261 | 5.93 | 0.0279 | Domain |
| Cluster2 | Fructose-bisphosphate aldolase class-I | 2 | 44 | 2 | 261 | 5.93 | 0.0279 | Domain |
| Cluster2 | Glutamate synthase central domain | 2 | 44 | 2 | 261 | 5.93 | 0.0279 | Domain |
| Cluster2 | Glutamine amidotransferase domain | 3 | 44 | 3 | 261 | 5.93 | 0.00452 | Domain |
| Cluster2 | Glutamine amidotransferases class-II | 2 | 44 | 2 | 261 | 5.93 | 0.0279 | Domain |
| Cluster2 | Oxidoreductase NAD-binding domain | 3 | 44 | 4 | 261 | 4.45 | 0.0159 | Domain |
| Cluster2 | Pyridine nucleotide-disulphide oxidoreductase | 2 | 44 | 2 | 261 | 5.93 | 0.0279 | Domain |
| Cluster3 | Ether lipid metabolism | 2 | 28 | 2 | 191 | 6.82 | 0.0208 | KEGG |
| Cluster3 | Glycerophospholipid metabolism | 4 | 28 | 6 | 191 | 4.55 | 0.0046 | KEGG |
| Cluster3 | Phenylalanine metabolism | 4 | 28 | 5 | 191 | 5.46 | 0.00171 | KEGG |
| Cluster3 | Starch and sucrose metabolism | 3 | 28 | 5 | 191 | 4.09 | 0.0232 | KEGG |
| Cluster3 | Golgi apparatus | 8 | 37 | 29 | 273 | 2.04 | 0.0269 | GO_CC |
| Cluster3 | Golgi apparatus subcompartment | 5 | 37 | 8 | 273 | 4.61 | 0.00146 | GO_CC |
| Cluster3 | cytoplasmic vesicle | 6 | 37 | 11 | 273 | 4.02 | 0.00117 | GO_CC |
| Cluster3 | endomembrane system | 11 | 37 | 43 | 273 | 1.89 | 0.0158 | GO_CC |
| Cluster3 | endosome | 5 | 37 | 9 | 273 | 4.1 | 0.00297 | GO_CC |
| Cluster3 | integral component of membrane | 7 | 37 | 18 | 273 | 2.87 | 0.00499 | GO_CC |
| Cluster3 | integral component of plasma membrane | 7 | 37 | 13 | 273 | 3.97 | 0.000455 | GO_CC |
| Cluster3 | intracellular vesicle | 6 | 37 | 11 | 273 | 4.02 | 0.00117 | GO_CC |
| Cluster3 | intrinsic component of membrane | 7 | 37 | 21 | 273 | 2.46 | 0.0133 | GO_CC |
| Cluster3 | intrinsic component of plasma membrane | 7 | 37 | 16 | 273 | 3.23 | 0.00222 | GO_CC |
| Cluster3 | organelle subcompartment | 5 | 37 | 15 | 273 | 2.46 | 0.0377 | GO_CC |
| Cluster3 | trans-Golgi network | 4 | 37 | 6 | 273 | 4.92 | 0.00356 | GO_CC |
| Cluster3 | vesicle | 7 | 37 | 12 | 273 | 4.3 | 0.000233 | GO_CC |
| Cluster3 | Beta-sandwich domain in beta galactosidase | 3 | 35 | 3 | 261 | 7.46 | 0.00223 | Domain |
| Cluster3 | Calcineurin-like phosphoesterase | 3 | 35 | 3 | 261 | 7.46 | 0.00223 | Domain |
| Cluster3 | Cytochrome P450 | 3 | 35 | 5 | 261 | 4.47 | 0.0184 | Domain |
| Cluster3 | Glycosyl hydrolases family 35 | 3 | 35 | 3 | 261 | 7.46 | 0.00223 | Domain |
| Cluster3 | Iron/zinc purple acid phosphatase-like protein C | 2 | 35 | 2 | 261 | 7.46 | 0.0175 | Domain |
| Cluster3 | Nucleoplasmin-like domain | 2 | 35 | 3 | 261 | 4.97 | 0.0481 | Domain |
| Cluster3 | Purple acid Phosphatase, N-terminal domain | 2 | 35 | 2 | 261 | 7.46 | 0.0175 | Domain |
| Cluster4 | Glyoxylate and dicarboxylate metabolism | 3 | 35 | 5 | 191 | 3.27 | 0.0436 | KEGG |
| Cluster4 | Phosphatidylinositol signaling system | 3 | 35 | 5 | 191 | 3.27 | 0.0436 | KEGG |
| Cluster4 | ATP binding | 2 | 50 | 2 | 242 | 4.84 | 0.042 | GO_MF |
| Cluster4 | Hsp90 protein binding | 2 | 50 | 2 | 242 | 4.84 | 0.042 | GO_MF |
| Cluster4 | adenyl nucleotide binding | 2 | 50 | 2 | 242 | 4.84 | 0.042 | GO_MF |
| Cluster4 | adenyl ribonucleotide binding | 2 | 50 | 2 | 242 | 4.84 | 0.042 | GO_MF |
| Cluster4 | glucuronosyltransferase activity | 2 | 50 | 2 | 242 | 4.84 | 0.042 | GO_MF |
| Cluster4 | heat shock protein binding | 2 | 50 | 2 | 242 | 4.84 | 0.042 | GO_MF |
| Cluster4 | methyl-CpG binding | 2 | 50 | 2 | 242 | 4.84 | 0.042 | GO_MF |
| Cluster4 | oxalate-CoA ligase activity | 2 | 50 | 2 | 242 | 4.84 | 0.042 | GO_MF |
| Cluster4 | oxidoreductase activity, acting on metal ions | 2 | 50 | 2 | 242 | 4.84 | 0.042 | GO_MF |
| Cluster4 | endoplasmic reticulum | 9 | 62 | 18 | 273 | 2.2 | 0.00802 | GO_CC |
| Cluster4 | extrinsic component of membrane | 3 | 62 | 4 | 273 | 3.3 | 0.0377 | GO_CC |
| Cluster5 | Proteasome | 3 | 36 | 3 | 191 | 5.31 | 0.00625 | KEGG |
| Cluster5 | Ribosome | 9 | 36 | 15 | 191 | 3.18 | 0.000257 | KEGG |
| Cluster5 | Ribosome biogenesis in eukaryotes | 3 | 36 | 4 | 191 | 3.98 | 0.0217 | KEGG |
| Cluster5 | Spliceosome | 4 | 36 | 6 | 191 | 3.54 | 0.0123 | KEGG |
| Cluster5 | Cul4-RING E3 ubiquitin ligase complex | 2 | 49 | 2 | 273 | 5.57 | 0.0317 | GO_CC |
| Cluster5 | catalytic complex | 6 | 49 | 15 | 273 | 2.23 | 0.0339 | GO_CC |
| Cluster5 | cell wall | 11 | 49 | 29 | 273 | 2.11 | 0.00572 | GO_CC |
| Cluster5 | chromosome | 3 | 49 | 5 | 273 | 3.34 | 0.0418 | GO_CC |
| Cluster5 | cullin-RING ubiquitin ligase complex | 2 | 49 | 2 | 273 | 5.57 | 0.0317 | GO_CC |
| Cluster5 | cytosol | 18 | 49 | 67 | 273 | 1.5 | 0.025 | GO_CC |
| Cluster5 | cytosolic ribosome | 8 | 49 | 13 | 273 | 3.43 | 0.000401 | GO_CC |
| Cluster5 | cytosolic small ribosomal subunit | 5 | 49 | 7 | 273 | 3.98 | 0.00245 | GO_CC |
| Cluster5 | endopeptidase complex | 2 | 49 | 2 | 273 | 5.57 | 0.0317 | GO_CC |
| Cluster5 | envelope | 6 | 49 | 15 | 273 | 2.23 | 0.0339 | GO_CC |
| Cluster5 | external encapsulating structure | 11 | 49 | 30 | 273 | 2.04 | 0.00778 | GO_CC |
| Cluster5 | intracellular membrane-bounded organelle | 41 | 49 | 182 | 273 | 1.26 | 0.00321 | GO_CC |
| Cluster5 | intracellular non-membrane-bounded organelle | 19 | 49 | 44 | 273 | 2.41 | 1.41E-05 | GO_CC |
| Cluster5 | intracellular organelle | 43 | 49 | 188 | 273 | 1.27 | 0.000803 | GO_CC |
| Cluster5 | intracellular organelle lumen | 17 | 49 | 35 | 273 | 2.71 | 6.53E-06 | GO_CC |
| Cluster5 | membrane-bounded organelle | 41 | 49 | 185 | 273 | 1.23 | 0.0053 | GO_CC |
| Cluster5 | membrane-enclosed lumen | 17 | 49 | 35 | 273 | 2.71 | 6.53E-06 | GO_CC |
| Cluster5 | non-membrane-bounded organelle | 19 | 49 | 44 | 273 | 2.41 | 1.41E-05 | GO_CC |
| Cluster5 | nuclear chromosome | 3 | 49 | 5 | 273 | 3.34 | 0.0418 | GO_CC |
| Cluster5 | nuclear lumen | 16 | 49 | 31 | 273 | 2.88 | 4.79E-06 | GO_CC |
| Cluster5 | nucleolus | 8 | 49 | 19 | 273 | 2.35 | 0.00961 | GO_CC |
| Cluster5 | nucleoplasm | 5 | 49 | 7 | 273 | 3.98 | 0.00245 | GO_CC |
| Cluster5 | nucleus | 26 | 49 | 64 | 273 | 2.26 | 4.68E-07 | GO_CC |
| Cluster5 | organelle | 43 | 49 | 190 | 273 | 1.26 | 0.00117 | GO_CC |
| Cluster5 | organelle envelope | 6 | 49 | 14 | 273 | 2.39 | 0.0236 | GO_CC |
| Cluster5 | organelle lumen | 17 | 49 | 35 | 273 | 2.71 | 6.53E-06 | GO_CC |
| Cluster5 | peptidase complex | 2 | 49 | 2 | 273 | 5.57 | 0.0317 | GO_CC |
| Cluster5 | polysomal ribosome | 5 | 49 | 8 | 273 | 3.48 | 0.00564 | GO_CC |
| Cluster5 | polysome | 5 | 49 | 8 | 273 | 3.48 | 0.00564 | GO_CC |
| Cluster5 | proteasome complex | 2 | 49 | 2 | 273 | 5.57 | 0.0317 | GO_CC |
| Cluster5 | protein-containing complex | 26 | 49 | 53 | 273 | 2.73 | 2.46E-09 | GO_CC |
| Cluster5 | ribonucleoprotein complex | 14 | 49 | 21 | 273 | 3.71 | 2.90E-07 | GO_CC |
| Cluster5 | ribosomal subunit | 8 | 49 | 13 | 273 | 3.43 | 0.000401 | GO_CC |
| Cluster5 | ribosome | 9 | 49 | 14 | 273 | 3.58 | 9.70E-05 | GO_CC |
| Cluster5 | small ribosomal subunit | 6 | 49 | 8 | 273 | 4.18 | 0.000535 | GO_CC |
| Cluster5 | small-subunit processome | 2 | 49 | 2 | 273 | 5.57 | 0.0317 | GO_CC |
| Cluster5 | ubiquitin ligase complex | 2 | 49 | 2 | 273 | 5.57 | 0.0317 | GO_CC |
| Cluster5 | Ubiquitin family | 2 | 40 | 2 | 261 | 6.53 | 0.023 | Domain |
| Cluster6 | Phagosome | 4 | 31 | 5 | 191 | 4.93 | 0.00259 | KEGG |
| Cluster6 | RNA transport | 2 | 31 | 2 | 191 | 6.16 | 0.0256 | KEGG |
| Cluster6 | DNA-dependent DNA replication | 2 | 31 | 3 | 261 | 5.61 | 0.038 | GO_BP |
| Cluster6 | acetyl-CoA biosynthetic process | 3 | 31 | 4 | 261 | 6.31 | 0.00564 | GO_BP |
| Cluster6 | acetyl-CoA metabolic process | 4 | 31 | 5 | 261 | 6.74 | 0.000763 | GO_BP |
| Cluster6 | acyl-CoA biosynthetic process | 3 | 31 | 4 | 261 | 6.31 | 0.00564 | GO_BP |
| Cluster6 | acyl-CoA metabolic process | 4 | 31 | 5 | 261 | 6.74 | 0.000763 | GO_BP |
| Cluster6 | anatomical structure morphogenesis | 8 | 31 | 27 | 261 | 2.49 | 0.00712 | GO_BP |
| Cluster6 | anisotropic cell growth | 2 | 31 | 3 | 261 | 5.61 | 0.038 | GO_BP |
| Cluster6 | anther dehiscence | 2 | 31 | 3 | 261 | 5.61 | 0.038 | GO_BP |
| Cluster6 | aromatic compound biosynthetic process | 7 | 31 | 26 | 261 | 2.27 | 0.0216 | GO_BP |
| Cluster6 | beta-glucan biosynthetic process | 6 | 31 | 13 | 261 | 3.89 | 0.00165 | GO_BP |
| Cluster6 | beta-glucan metabolic process | 6 | 31 | 13 | 261 | 3.89 | 0.00165 | GO_BP |
| Cluster6 | biological regulation | 15 | 31 | 79 | 261 | 1.6 | 0.0188 | GO_BP |
| Cluster6 | biosynthetic process | 18 | 31 | 86 | 261 | 1.76 | 0.00196 | GO_BP |
| Cluster6 | carbohydrate biosynthetic process | 7 | 31 | 17 | 261 | 3.47 | 0.00142 | GO_BP |
| Cluster6 | carbohydrate derivative biosynthetic process | 5 | 31 | 13 | 261 | 3.24 | 0.0111 | GO_BP |
| Cluster6 | carbohydrate derivative metabolic process | 7 | 31 | 22 | 261 | 2.68 | 0.008 | GO_BP |
| Cluster6 | carbohydrate metabolic process | 8 | 31 | 27 | 261 | 2.49 | 0.00712 | GO_BP |
| Cluster6 | carboxylic acid biosynthetic process | 6 | 31 | 22 | 261 | 2.3 | 0.0321 | GO_BP |
| Cluster6 | cell cycle | 6 | 31 | 17 | 261 | 2.97 | 0.00832 | GO_BP |
| Cluster6 | cell cycle DNA replication | 2 | 31 | 3 | 261 | 5.61 | 0.038 | GO_BP |
| Cluster6 | cell cycle process | 6 | 31 | 17 | 261 | 2.97 | 0.00832 | GO_BP |
| Cluster6 | cell division | 4 | 31 | 10 | 261 | 3.37 | 0.0207 | GO_BP |
| Cluster6 | cell growth | 8 | 31 | 18 | 261 | 3.74 | 0.000307 | GO_BP |
| Cluster6 | cell wall assembly | 2 | 31 | 3 | 261 | 5.61 | 0.038 | GO_BP |
| Cluster6 | cell wall biogenesis | 4 | 31 | 12 | 261 | 2.81 | 0.0409 | GO_BP |
| Cluster6 | cell wall organization or biogenesis | 6 | 31 | 23 | 261 | 2.2 | 0.0397 | GO_BP |
| Cluster6 | cellular biosynthetic process | 18 | 31 | 79 | 261 | 1.92 | 0.000572 | GO_BP |
| Cluster6 | cellular carbohydrate biosynthetic process | 7 | 31 | 15 | 261 | 3.93 | 0.000559 | GO_BP |
| Cluster6 | cellular carbohydrate metabolic process | 7 | 31 | 20 | 261 | 2.95 | 0.00434 | GO_BP |
| Cluster6 | cellular component morphogenesis | 5 | 31 | 17 | 261 | 2.48 | 0.0374 | GO_BP |
| Cluster6 | cellular developmental process | 8 | 31 | 28 | 261 | 2.41 | 0.00912 | GO_BP |
| Cluster6 | cellular glucan metabolic process | 6 | 31 | 15 | 261 | 3.37 | 0.00402 | GO_BP |
| Cluster6 | cellular lipid metabolic process | 9 | 31 | 30 | 261 | 2.53 | 0.00366 | GO_BP |
| Cluster6 | cellular macromolecule biosynthetic process | 8 | 31 | 27 | 261 | 2.49 | 0.00712 | GO_BP |
| Cluster6 | cellular nitrogen compound biosynthetic process | 7 | 31 | 26 | 261 | 2.27 | 0.0216 | GO_BP |
| Cluster6 | cellular polysaccharide biosynthetic process | 6 | 31 | 14 | 261 | 3.61 | 0.00263 | GO_BP |
| Cluster6 | cellular polysaccharide metabolic process | 6 | 31 | 17 | 261 | 2.97 | 0.00832 | GO_BP |
| Cluster6 | cellulose biosynthetic process | 6 | 31 | 13 | 261 | 3.89 | 0.00165 | GO_BP |
| Cluster6 | cellulose metabolic process | 6 | 31 | 13 | 261 | 3.89 | 0.00165 | GO_BP |
| Cluster6 | cellulose microfibril organization | 2 | 31 | 3 | 261 | 5.61 | 0.038 | GO_BP |
| Cluster6 | cortical cytoskeleton organization | 3 | 31 | 6 | 261 | 4.21 | 0.0238 | GO_BP |
| Cluster6 | cortical microtubule organization | 3 | 31 | 6 | 261 | 4.21 | 0.0238 | GO_BP |
| Cluster6 | cytokinesis | 4 | 31 | 10 | 261 | 3.37 | 0.0207 | GO_BP |
| Cluster6 | cytoplasmic microtubule organization | 3 | 31 | 6 | 261 | 4.21 | 0.0238 | GO_BP |
| Cluster6 | cytoskeleton organization | 5 | 31 | 12 | 261 | 3.51 | 0.00745 | GO_BP |
| Cluster6 | cytoskeleton-dependent cytokinesis | 4 | 31 | 10 | 261 | 3.37 | 0.0207 | GO_BP |
| Cluster6 | dehiscence | 2 | 31 | 3 | 261 | 5.61 | 0.038 | GO_BP |
| Cluster6 | fatty acid biosynthetic process | 4 | 31 | 7 | 261 | 4.81 | 0.00448 | GO_BP |
| Cluster6 | fatty acid metabolic process | 5 | 31 | 11 | 261 | 3.83 | 0.00475 | GO_BP |
| Cluster6 | glucan biosynthetic process | 6 | 31 | 13 | 261 | 3.89 | 0.00165 | GO_BP |
| Cluster6 | glucan metabolic process | 6 | 31 | 15 | 261 | 3.37 | 0.00402 | GO_BP |
| Cluster6 | growth | 8 | 31 | 21 | 261 | 3.21 | 0.0011 | GO_BP |
| Cluster6 | heterocycle biosynthetic process | 7 | 31 | 17 | 261 | 3.47 | 0.00142 | GO_BP |
| Cluster6 | heterocycle metabolic process | 10 | 31 | 45 | 261 | 1.87 | 0.0226 | GO_BP |
| Cluster6 | lipid biosynthetic process | 6 | 31 | 21 | 261 | 2.41 | 0.0255 | GO_BP |
| Cluster6 | lipid metabolic process | 9 | 31 | 30 | 261 | 2.53 | 0.00366 | GO_BP |
| Cluster6 | lipid modification | 3 | 31 | 5 | 261 | 5.05 | 0.013 | GO_BP |
| Cluster6 | macromolecule biosynthetic process | 8 | 31 | 31 | 261 | 2.17 | 0.0178 | GO_BP |
| Cluster6 | microtubule-based process | 4 | 31 | 9 | 261 | 3.74 | 0.0135 | GO_BP |
| Cluster6 | mitotic cell cycle | 6 | 31 | 14 | 261 | 3.61 | 0.00263 | GO_BP |
| Cluster6 | mitotic cell cycle process | 6 | 31 | 14 | 261 | 3.61 | 0.00263 | GO_BP |
| Cluster6 | mitotic cytokinesis | 4 | 31 | 10 | 261 | 3.37 | 0.0207 | GO_BP |
| Cluster6 | monocarboxylic acid biosynthetic process | 5 | 31 | 9 | 261 | 4.68 | 0.00155 | GO_BP |
| Cluster6 | monocarboxylic acid metabolic process | 6 | 31 | 17 | 261 | 2.97 | 0.00832 | GO_BP |
| Cluster6 | multicellular organism reproduction | 3 | 31 | 6 | 261 | 4.21 | 0.0238 | GO_BP |
| Cluster6 | multicellular organismal reproductive process | 3 | 31 | 6 | 261 | 4.21 | 0.0238 | GO_BP |
| Cluster6 | multidimensional cell growth | 3 | 31 | 6 | 261 | 4.21 | 0.0238 | GO_BP |
| Cluster6 | nucleobase-containing compound metabolic process | 9 | 31 | 42 | 261 | 1.8 | 0.0398 | GO_BP |
| Cluster6 | nucleoside bisphosphate biosynthetic process | 3 | 31 | 4 | 261 | 6.31 | 0.00564 | GO_BP |
| Cluster6 | nucleoside bisphosphate metabolic process | 4 | 31 | 5 | 261 | 6.74 | 0.000763 | GO_BP |
| Cluster6 | nucleoside phosphate biosynthetic process | 4 | 31 | 8 | 261 | 4.21 | 0.00821 | GO_BP |
| Cluster6 | nucleoside phosphate metabolic process | 5 | 31 | 15 | 261 | 2.81 | 0.0217 | GO_BP |
| Cluster6 | nucleotide biosynthetic process | 4 | 31 | 8 | 261 | 4.21 | 0.00821 | GO_BP |
| Cluster6 | nucleotide metabolic process | 5 | 31 | 15 | 261 | 2.81 | 0.0217 | GO_BP |
| Cluster6 | organic acid biosynthetic process | 6 | 31 | 22 | 261 | 2.3 | 0.0321 | GO_BP |
| Cluster6 | organic cyclic compound biosynthetic process | 8 | 31 | 26 | 261 | 2.59 | 0.00547 | GO_BP |
| Cluster6 | organic cyclic compound metabolic process | 11 | 31 | 56 | 261 | 1.65 | 0.0411 | GO_BP |
| Cluster6 | organic substance biosynthetic process | 18 | 31 | 84 | 261 | 1.8 | 0.00141 | GO_BP |
| Cluster6 | organic substance metabolic process | 23 | 31 | 149 | 261 | 1.3 | 0.0297 | GO_BP |
| Cluster6 | organophosphate biosynthetic process | 5 | 31 | 13 | 261 | 3.24 | 0.0111 | GO_BP |
| Cluster6 | organophosphate metabolic process | 7 | 31 | 23 | 261 | 2.56 | 0.0105 | GO_BP |
| Cluster6 | phosphate-containing compound metabolic process | 9 | 31 | 42 | 261 | 1.8 | 0.0398 | GO_BP |
| Cluster6 | phosphorus metabolic process | 10 | 31 | 44 | 261 | 1.91 | 0.0192 | GO_BP |
| Cluster6 | plant epidermal cell differentiation | 3 | 31 | 5 | 261 | 5.05 | 0.013 | GO_BP |
| Cluster6 | plant-type cell wall assembly | 2 | 31 | 3 | 261 | 5.61 | 0.038 | GO_BP |
| Cluster6 | plant-type cell wall biogenesis | 4 | 31 | 11 | 261 | 3.06 | 0.0298 | GO_BP |
| Cluster6 | plant-type cell wall organization or biogenesis | 5 | 31 | 18 | 261 | 2.34 | 0.0474 | GO_BP |
| Cluster6 | plant-type primary cell wall biogenesis | 4 | 31 | 10 | 261 | 3.37 | 0.0207 | GO_BP |
| Cluster6 | polysaccharide biosynthetic process | 6 | 31 | 14 | 261 | 3.61 | 0.00263 | GO_BP |
| Cluster6 | polysaccharide metabolic process | 6 | 31 | 17 | 261 | 2.97 | 0.00832 | GO_BP |
| Cluster6 | primary metabolic process | 21 | 31 | 127 | 261 | 1.39 | 0.0186 | GO_BP |
| Cluster6 | protein localization to cell cortex | 2 | 31 | 3 | 261 | 5.61 | 0.038 | GO_BP |
| Cluster6 | protein localization to cell periphery | 2 | 31 | 3 | 261 | 5.61 | 0.038 | GO_BP |
| Cluster6 | protein localization to cytoskeleton | 2 | 31 | 3 | 261 | 5.61 | 0.038 | GO_BP |
| Cluster6 | protein localization to microtubule cytoskeleton | 2 | 31 | 3 | 261 | 5.61 | 0.038 | GO_BP |
| Cluster6 | purine nucleoside bisphosphate metabolic process | 4 | 31 | 5 | 261 | 6.74 | 0.000763 | GO_BP |
| Cluster6 | purine nucleotide biosynthetic process | 4 | 31 | 5 | 261 | 6.74 | 0.000763 | GO_BP |
| Cluster6 | purine nucleotide metabolic process | 5 | 31 | 6 | 261 | 7.02 | 9.61E-05 | GO_BP |
| Cluster6 | purine ribonucleotide biosynthetic process | 4 | 31 | 5 | 261 | 6.74 | 0.000763 | GO_BP |
| Cluster6 | purine ribonucleotide metabolic process | 5 | 31 | 6 | 261 | 7.02 | 9.61E-05 | GO_BP |
| Cluster6 | purine-containing compound biosynthetic process | 4 | 31 | 6 | 261 | 5.61 | 0.0021 | GO_BP |
| Cluster6 | purine-containing compound metabolic process | 5 | 31 | 7 | 261 | 6.01 | 0.000308 | GO_BP |
| Cluster6 | regulation of anatomical structure morphogenesis | 3 | 31 | 5 | 261 | 5.05 | 0.013 | GO_BP |
| Cluster6 | regulation of biological process | 13 | 31 | 63 | 261 | 1.74 | 0.0154 | GO_BP |
| Cluster6 | regulation of cell population proliferation | 2 | 31 | 3 | 261 | 5.61 | 0.038 | GO_BP |
| Cluster6 | regulation of cellular ketone metabolic process | 2 | 31 | 3 | 261 | 5.61 | 0.038 | GO_BP |
| Cluster6 | regulation of cellular process | 11 | 31 | 54 | 261 | 1.72 | 0.0315 | GO_BP |
| Cluster6 | regulation of cytoskeleton organization | 3 | 31 | 4 | 261 | 6.31 | 0.00564 | GO_BP |
| Cluster6 | regulation of metabolic process | 7 | 31 | 29 | 261 | 2.03 | 0.0392 | GO_BP |
| Cluster6 | regulation of microtubule-based process | 2 | 31 | 3 | 261 | 5.61 | 0.038 | GO_BP |
| Cluster6 | regulation of organelle organization | 3 | 31 | 4 | 261 | 6.31 | 0.00564 | GO_BP |
| Cluster6 | regulation of photoperiodism, flowering | 2 | 31 | 3 | 261 | 5.61 | 0.038 | GO_BP |
| Cluster6 | regulation of plant organ morphogenesis | 2 | 31 | 3 | 261 | 5.61 | 0.038 | GO_BP |
| Cluster6 | regulation of root development | 2 | 31 | 3 | 261 | 5.61 | 0.038 | GO_BP |
| Cluster6 | regulation of root morphogenesis | 2 | 31 | 3 | 261 | 5.61 | 0.038 | GO_BP |
| Cluster6 | regulation of salicylic acid metabolic process | 2 | 31 | 2 | 261 | 8.42 | 0.0137 | GO_BP |
| Cluster6 | response to water | 4 | 31 | 12 | 261 | 2.81 | 0.0409 | GO_BP |
| Cluster6 | response to water deprivation | 4 | 31 | 12 | 261 | 2.81 | 0.0409 | GO_BP |
| Cluster6 | ribonucleoside bisphosphate biosynthetic process | 3 | 31 | 4 | 261 | 6.31 | 0.00564 | GO_BP |
| Cluster6 | ribonucleoside bisphosphate metabolic process | 4 | 31 | 5 | 261 | 6.74 | 0.000763 | GO_BP |
| Cluster6 | ribonucleotide biosynthetic process | 4 | 31 | 6 | 261 | 5.61 | 0.0021 | GO_BP |
| Cluster6 | ribonucleotide metabolic process | 5 | 31 | 7 | 261 | 6.01 | 0.000308 | GO_BP |
| Cluster6 | ribose phosphate biosynthetic process | 4 | 31 | 6 | 261 | 5.61 | 0.0021 | GO_BP |
| Cluster6 | ribose phosphate metabolic process | 5 | 31 | 11 | 261 | 3.83 | 0.00475 | GO_BP |
| Cluster6 | sulfur compound biosynthetic process | 4 | 31 | 11 | 261 | 3.06 | 0.0298 | GO_BP |
| Cluster6 | sulfur compound metabolic process | 5 | 31 | 15 | 261 | 2.81 | 0.0217 | GO_BP |
| Cluster6 | thioester biosynthetic process | 3 | 31 | 4 | 261 | 6.31 | 0.00564 | GO_BP |
| Cluster6 | thioester metabolic process | 4 | 31 | 5 | 261 | 6.74 | 0.000763 | GO_BP |
| Cluster6 | ATP-independent citrate lyase complex | 3 | 39 | 4 | 273 | 5.25 | 0.00981 | GO_CC |
| Cluster6 | Golgi apparatus | 8 | 39 | 29 | 273 | 1.93 | 0.0367 | GO_CC |
| Cluster6 | catalytic complex | 5 | 39 | 15 | 273 | 2.33 | 0.0466 | GO_CC |
| Cluster6 | cell junction | 13 | 39 | 56 | 273 | 1.62 | 0.031 | GO_CC |
| Cluster6 | cell-cell junction | 13 | 39 | 56 | 273 | 1.62 | 0.031 | GO_CC |
| Cluster6 | cellulose synthase complex | 3 | 39 | 6 | 273 | 3.5 | 0.0398 | GO_CC |
| Cluster6 | cytoskeleton | 4 | 39 | 9 | 273 | 3.11 | 0.0265 | GO_CC |
| Cluster6 | plasmodesma | 13 | 39 | 56 | 273 | 1.62 | 0.031 | GO_CC |
| Cluster6 | symplast | 13 | 39 | 56 | 273 | 1.62 | 0.031 | GO_CC |
| Cluster6 | transferase complex | 4 | 39 | 10 | 273 | 2.8 | 0.0396 | GO_CC |
| Cluster6 | ATP citrate lyase citrate-binding | 3 | 40 | 4 | 261 | 4.89 | 0.012 | Domain |
| Cluster6 | ATP-grasp domain | 3 | 40 | 4 | 261 | 4.89 | 0.012 | Domain |
| Cluster6 | Chitinase class I | 2 | 40 | 2 | 261 | 6.53 | 0.023 | Domain |
| Cluster6 | Multicopper oxidase | 6 | 40 | 15 | 261 | 2.61 | 0.0155 | Domain |
| Cluster6 | Tubulin C-terminal domain | 3 | 40 | 3 | 261 | 6.52 | 0.00337 | Domain |
| Cluster6 | Tubulin/FtsZ family, GTPase domain | 3 | 40 | 3 | 261 | 6.52 | 0.00337 | Domain |

**Table S8 ion peak area of unique peptides**

| Protein accession | Peptide | Protein description | Gene name | Retention time | Area | | | | | | | | | | | | | | |
| --- | --- | --- | --- | --- | --- | --- | --- | --- | --- | --- | --- | --- | --- | --- | --- | --- | --- | --- | --- |
| CK_1 | CK_2 | CK_3 | H12_1 | H12_2 | H12_3 | D1_1 | D1_2 | D1_3 | D3_1 | D3_2 | D3_3 | D7_1 | D7_2 | D7_3 |
| I1L905 | INTLLQGYSGIR | Phenylalanine ammonia-lyase | GLYMA_10G058200 | 17.64 | 3.98e+07 | 4.73e+07 | 3.89e+07 | 3.04e+07 | 3.82e+07 | 2.46e+07 | 3.20e+07 | 2.75e+07 | 3.24e+07 | 2.27e+07 | 3.13e+07 | 2.75e+07 | 6.70e+07 | 5.85e+07 | 6.65e+07 |
| I1L905 | LLNNNITPCLPLR | Phenylalanine ammonia-lyase | GLYMA_10G058200 | 20.19 | 1.44e+07 | 1.55e+07 | 1.65e+07 | 1.18e+07 | 1.83e+07 | 1.19e+07 | 1.18e+07 | 1.28e+07 | 1.20e+07 | 1.02e+07 | 8.78e+06 | 1.11e+07 | 2.65e+07 | 2.82e+07 | 1.69e+07 |
| I1MB15 | ALGSATYAPANSTR | HECT-type E3 ubiquitin transferase | 100788161 | 10.55 | 1.48e+06 | 1.40e+06 | 1.18e+06 | 1.73e+06 | 1.82e+06 | 1.47e+06 | 1.48e+06 | 1.51e+06 | 1.24e+06 | 1.72e+06 | 2.38e+06 | 1.69e+06 | 1.72e+06 | 2.00e+06 | 1.75e+06 |
| I1MB15 | AYVLEDSYNQLR | HECT-type E3 ubiquitin transferase | 100788161 | 15.92 | 3.84e+06 | 3.82e+06 | 4.45e+06 | 4.23e+06 | 4.81e+06 | 4.82e+06 | 5.12e+06 | 5.20e+06 | 4.49e+06 | 4.80e+06 | 5.34e+06 | 5.59e+06 | 5.23e+06 | 5.18e+06 | 4.91e+06 |
| I1KA18 | TNVDYTIDLLNASDYR | Acetyl-CoA carboxylase | 100803679 | 21.45 | 1.17e+07 | 9.31e+06 | 1.10e+07 | 1.03e+07 | 9.10e+06 | 9.43e+06 | 1.13e+07 | 1.11e+07 | 9.12e+06 | 7.24e+06 | 9.80e+06 | 7.78e+06 | 1.10e+07 | 1.12e+07 | 1.12e+07 |
| I1KA18 | EDGLGVENLSGSGAIAGAYSR | Acetyl-CoA carboxylase | 100803679 | 17.83 | 8.95e+06 | 8.16e+06 | 8.32e+06 | 7.01e+06 | 4.85e+06 | 7.35e+06 | 6.17e+06 | 6.94e+06 | 6.79e+06 | 5.23e+06 | 8.22e+06 | 5.83e+06 | 8.55e+06 | 7.88e+06 | 7.47e+06 |
| Q2LAL0 | NLPPGPTPLPIIGNLNLVEQPIHR | Cytochrome P450 monooxygenase CYP81E11 | CYP81E11 | 24.44 | 2.16e+05 | 1.70e+05 | 1.71e+05 | 1.35e+05 | 1.30e+05 | 1.35e+05 | 1.46e+05 | 1.40e+05 | 1.63e+05 | 1.23e+05 | 1.64e+05 | 1.62e+05 | 3.67e+05 | 2.83e+05 | 2.87e+05 |
| Q2LAL0 | IVLETLR | Cytochrome P450 monooxygenase CYP81E11 | CYP81E11 | 15.25 | 2.63e+06 | 2.56e+06 | 2.69e+06 | 1.73e+06 | 1.83e+06 | 1.54e+06 | 1.09e+06 | 1.38e+06 | 1.94e+06 | 1.31e+06 | 1.89e+06 | 2.19e+06 | 4.06e+06 | 3.09e+06 | 3.12e+06 |
| I1N6P9 | VQGLENVR | Putative E3 ubiquitin-protein ligase HERC4(predicted) | 100779559 | 10.22 | 5.35e+06 | 5.57e+06 | 6.28e+06 | 4.34e+06 | 6.93e+06 | 5.08e+06 | 6.71e+06 | 5.41e+06 | 5.93e+06 | 6.67e+06 | 8.05e+06 | 7.45e+06 | 6.35e+06 | 4.45e+06 | 4.13e+06 |
| A0A0R0JSY5 | YSPSSTPSTK | F-box domain-containing protein | GLYMA_06G155700 | 7.24 | 4.25e+06 | 3.30e+06 | 4.37e+06 | 4.48e+06 | 5.70e+06 | 3.82e+06 | 4.33e+06 | 4.27e+06 | 4.05e+06 | 4.12e+06 | 3.86e+06 | 3.55e+06 | 4.61e+06 | 3.46e+06 | 3.59e+06 |
| A0A0R0JSY5 | NLHTVDYVK | F-box domain-containing protein | GLYMA_06G155700 | 9.99 | 4.30e+06 | 3.63e+06 | 5.05e+06 | 4.15e+06 | 4.50e+06 | 3.88e+06 | 4.01e+06 | 3.66e+06 | 4.09e+06 | 3.91e+06 | 4.72e+06 | 4.66e+06 | 4.76e+06 | 3.78e+06 | 4.05e+06 |
| A0A0R0HQB8 | ATGEHTSYHYFLYESGK | Purple acid phosphatase | GLYMA_10G071000 | 12.79 | 3.95e+06 | 4.78e+06 | 5.16e+06 | 4.12e+06 | 4.64e+06 | 3.63e+06 | 4.27e+06 | 3.52e+06 | 4.13e+06 | 3.10e+06 | 2.88e+06 | 4.62e+06 | 2.31e+07 | 1.45e+07 | 1.99e+07 |
| A0A0R0HQB8 | CGGSGSEFSFK | Purple acid phosphatase | GLYMA_10G071000 | 12.86 | 3.86e+05 | 4.32e+05 | 9.81e+05 | 4.54e+05 | 3.66e+05 | 4.29e+05 | 6.19e+05 | 2.91e+05 | 3.90e+05 | 3.88e+05 | 7.16e+05 | 2.17e+05 | 4.51e+06 | 2.36e+06 | 2.40e+06 |
| I1LW34 | AYTPTSSVDEVGFFDLLIK | Nitrate reductase | GLYMA_13G084000 | 26.38 | 1.35e+05 | 1.14e+05 | 1.27e+05 | 4.90e+05 | 6.12e+05 | 6.05e+05 | 3.05e+06 | 2.90e+06 | 3.70e+06 | 2.90e+06 | 3.24e+06 | 3.85e+06 | 2.52e+05 | 2.09e+05 | 1.37e+05 |
| A0A0R4J375 | DQWSPALTLK | E2 ubiquitin-conjugating enzyme | GLYMA_04G199200 | 18.54 | 8.68e+06 | 7.83e+06 | 7.72e+06 | 7.79e+06 | 5.52e+06 | 6.07e+06 | 6.19e+06 | 6.57e+06 | 7.93e+06 | 8.65e+06 | 1.12e+07 | 8.07e+06 | 8.07e+06 | 6.84e+06 | 8.38e+06 |
| A0A0R4J375 | DYQTFVNTAR | E2 ubiquitin-conjugating enzyme | GLYMA_04G199200 | 13.9 | 8.17e+06 | 7.14e+06 | 6.71e+06 | 5.87e+06 | 5.46e+06 | 5.82e+06 | 6.86e+06 | 6.51e+06 | 6.96e+06 | 9.61e+06 | 1.14e+07 | 1.04e+07 | 7.06e+06 | 6.70e+06 | 6.30e+06 |
| K7MQ50 | IVSSPVVETR | RING-type E3 ubiquitin transferase | 100811250 | 11.64 | 5.24e+06 | 4.87e+06 | 5.39e+06 | 4.14e+06 | 3.95e+06 | 5.28e+06 | 5.29e+06 | 4.87e+06 | 4.77e+06 | 5.73e+06 | 4.89e+06 | 4.37e+06 | 5.15e+06 | 4.71e+06 | 3.49e+06 |
| K7MQ50 | AVAVLANLATIPEGR | RING-type E3 ubiquitin transferase | 100811250 | 21.51 | 6.69e+06 | 5.71e+06 | 6.44e+06 | 5.78e+06 | 5.21e+06 | 2.88e+06 | 7.42e+06 | 5.96e+06 | 6.35e+06 | 6.40e+06 | 7.43e+06 | 6.02e+06 | 5.90e+06 | 5.38e+06 | 5.06e+06 |
| C3UZD3 | VDSLDYVWR | Phosphate transporter 7 | PT7 | 18.27 | 3.40e+06 | 4.32e+06 | 4.60e+06 | 5.24e+06 | 4.59e+06 | 4.13e+06 | 2.89e+06 | 3.22e+06 | 3.48e+06 | 2.66e+06 | 3.22e+06 | 3.42e+06 | 1.44e+07 | 1.06e+07 | 1.30e+07 |
| C3UZD3 | STCHGISAAAGK | Phosphate transporter 7 | PT7 | 6.36 | 5.27e+06 | 6.28e+06 | 6.87e+06 | 5.01e+06 | 5.64e+06 | 4.45e+06 | 6.89e+06 | 6.56e+06 | 6.79e+06 | 8.34e+06 | 8.18e+06 | 1.05e+07 | 3.42e+07 | 3.36e+07 | 3.00e+07 |
| C3UZD4 | EQIQVLNALDVAK | Phosphate transporter 2 | PT2 | 20.36 | 2.65e+06 | 2.01e+06 | 2.04e+06 | 3.82e+06 | 2.48e+06 | 2.93e+06 | 2.23e+06 | 2.04e+06 | 2.75e+06 | 1.67e+06 | 2.50e+06 | 3.04e+06 | 5.19e+06 | 5.39e+06 | 6.80e+06 |
| C3UZD4 | DIFSAIGWIPPAK | Phosphate transporter 2 | PT2 | 25.14 | 2.17e+07 | 1.91e+07 | 2.52e+07 | 2.56e+07 | 2.78e+07 | 2.62e+07 | 2.46e+07 | 3.02e+07 | 3.26e+07 | 5.55e+07 | 5.32e+07 | 6.59e+07 | 2.45e+08 | 2.46e+08 | 2.25e+08 |
| I1N6I4 | LSNEELQSAFSEWNK | 6-phosphogluconate dehydrogenase, decarboxylating | 100799034 | 19.72 | 1.13e+07 | 1.03e+07 | 9.73e+06 | 7.46e+06 | 7.04e+06 | 9.03e+06 | 7.47e+06 | 7.54e+06 | 8.46e+06 | 9.47e+06 | 1.06e+07 | 1.07e+07 | 1.30e+07 | 1.17e+07 | 1.34e+07 |
| I1N6I4 | VPANLVQAQR | 6-phosphogluconate dehydrogenase, decarboxylating | 100799034 | 11.26 | 4.20e+07 | 3.67e+07 | 3.66e+07 | 3.95e+07 | 2.99e+07 | 3.10e+07 | 3.09e+07 | 3.41e+07 | 3.11e+07 | 3.63e+07 | 3.45e+07 | 3.69e+07 | 4.40e+07 | 3.93e+07 | 4.94e+07 |
| I1J8T0 | QVDVVICSFGR | Isoflavone reductase | IFR1 | 17.67 | 6.47e+07 | 6.18e+07 | 7.42e+07 | 5.49e+07 | 6.07e+07 | 6.04e+07 | 7.22e+07 | 6.77e+07 | 6.48e+07 | 4.30e+07 | 5.64e+07 | 5.35e+07 | 9.24e+07 | 7.70e+07 | 8.63e+07 |
| I1J8T0 | GAYITEADVGTFTIEAANDPR | Isoflavone reductase | IFR1 | 20.28 | 6.52e+07 | 6.99e+07 | 7.03e+07 | 5.21e+07 | 6.54e+07 | 5.49e+07 | 6.82e+07 | 6.99e+07 | 5.81e+07 | 4.69e+07 | 5.02e+07 | 5.40e+07 | 1.01e+08 | 9.20e+07 | 8.76e+07 |
| A0A0R0IM08 | GGANFVNSGYTK | Putative aquaporin PIP1-2(predicted) | GLYMA_08G015300 | 11.19 | 3.17e+07 | 2.41e+07 | 2.84e+07 | 3.17e+07 | 2.53e+07 | 2.61e+07 | 2.02e+07 | 2.06e+07 | 2.22e+07 | 1.54e+07 | 1.76e+07 | 1.69e+07 | 2.62e+07 | 2.60e+07 | 2.14e+07 |
| A0A0R0IM08 | SLGAAIIYNR | Putative aquaporin PIP1-2(predicted) | GLYMA_08G015300 | 15.52 | 1.42e+08 | 1.71e+08 | 1.92e+08 | 2.22e+08 | 2.09e+08 | 2.10e+08 | 1.84e+08 | 1.41e+08 | 1.41e+08 | 1.13e+08 | 1.34e+08 | 1.22e+08 | 1.48e+08 | 1.81e+08 | 1.84e+08 |
| I1JRI7 | AVVVHADPDDLGK | Superoxide dismutase [Cu-Zn] | GLYMA_03G242900 | 11.69 | 3.62e+08 | 3.06e+08 | 3.00e+08 | 3.03e+08 | 3.21e+08 | 3.00e+08 | 2.87e+08 | 2.84e+08 | 2.63e+08 | 3.34e+08 | 3.11e+08 | 4.07e+08 | 3.92e+08 | 4.00e+08 | 2.79e+08 |
| I1JRI7 | VACGIIGLQG | Superoxide dismutase [Cu-Zn] | GLYMA_03G242900 | 19.11 | 4.29e+07 | 3.78e+07 | 3.99e+07 | 3.95e+07 | 3.85e+07 | 4.09e+07 | 3.78e+07 | 4.54e+07 | 3.82e+07 | 4.08e+07 | 4.69e+07 | 4.72e+07 | 4.70e+07 | 4.13e+07 | 4.28e+07 |
| I1KDL4 | VTVQGEVIEQSFGEQHLCFR | Phosphoenolpyruvate carboxylase | Gmppc2 | 18.86 | 2.37e+07 | 2.45e+07 | 2.64e+07 | 2.18e+07 | 2.18e+07 | 2.12e+07 | 1.81e+07 | 2.60e+07 | 1.99e+07 | 2.26e+07 | 2.59e+07 | 2.34e+07 | 3.55e+07 | 4.19e+07 | 4.28e+07 |
| I1KDL4 | LLVSEDLWSFGEQLR | Phosphoenolpyruvate carboxylase | Gmppc2 | 24.53 | 1.68e+07 | 1.97e+07 | 2.18e+07 | 2.25e+07 | 2.41e+07 | 2.43e+07 | 1.90e+07 | 2.38e+07 | 1.68e+07 | 2.04e+07 | 1.57e+07 | 1.50e+07 | 3.86e+07 | 2.55e+07 | 6.10e+07 |

**Table S9 COG/KOG functional annotations of the differential ubiquitination-regulated proteins of soybean roots under low-phosphorus stress.**

| **COG/KOG category** | **Category description** | **Number of proteins** |
| --- | --- | --- |
| INFORMATION STORAGE AND PROCESSING | [A] RNA processing and modification | 26 |
| INFORMATION STORAGE AND PROCESSING | [B] Chromatin structure and dynamics | 3 |
| METABOLISM | [C] Energy production and conversion | 27 |
| CELLULAR PROCESSES AND SIGNALING | [D] Cell cycle control, cell division, chromosome partitioning | 3 |
| METABOLISM | [E] Amino acid transport and metabolism | 21 |
| METABOLISM | [F] Nucleotide transport and metabolism | 5 |
| METABOLISM | [G] Carbohydrate transport and metabolism | 36 |
| METABOLISM | [H] Coenzyme transport and metabolism | 9 |
| METABOLISM | [I] Lipid transport and metabolism | 22 |
| INFORMATION STORAGE AND PROCESSING | [J] Translation, ribosomal structure and biogenesis | 47 |
| INFORMATION STORAGE AND PROCESSING | [K] Transcription | 9 |
| INFORMATION STORAGE AND PROCESSING | [L] Replication, recombination and repair | 8 |
| CELLULAR PROCESSES AND SIGNALING | [M] Cell wall/membrane/envelope biogenesis | 11 |
| CELLULAR PROCESSES AND SIGNALING | [O] Posttranslational modification, protein turnover, chaperones | 72 |
| METABOLISM | [P] Inorganic ion transport and metabolism | 25 |
| METABOLISM | [Q] Secondary metabolites biosynthesis, transport and catabolism | 28 |
| POORLY CHARACTERIZED | [S] Function unknown | 45 |
| CELLULAR PROCESSES AND SIGNALING | [T] Signal transduction mechanisms | 40 |
| CELLULAR PROCESSES AND SIGNALING | [U] Intracellular trafficking, secretion, and vesicular transport | 37 |
| CELLULAR PROCESSES AND SIGNALING | [V] Defense mechanisms | 8 |
| CELLULAR PROCESSES AND SIGNALING | [Y] Nuclear structure | 2 |
| CELLULAR PROCESSES AND SIGNALING | [Z] Cytoskeleton | 9 |
